# Supplementary material for: Risk-Acceptance Criteria in Occupational Health and Safety Risk-Assessment—The State-of-the-Art through a Systematic Literature Review
Source: MDPI journal article supplement (doi:10.3390/safety7040077), 2021-11-03
Supplement: s1 [file s1]

Archive with 3 entries (3 files):
- Supplementary Material_A__Table S1_final.xlsx
- Supplementary Material_B__Table S2_final.pdf
- Supplementary Material_C__Table S3_final.pdf
