# Supplementary material for: Risk-Acceptance Criteria in Occupational Health and Safety Risk-Assessment—The State-of-the-Art through a Systematic Literature Review
Source: MDPI journal article supplement (doi:10.3390/safety7040077), 2021-11-03
Supplement: s1 [file s1]

### Supplementary Material #B.

Supplementary data, pertaining to this study, are depicted online and associated with an extra table which illustrates - in column form – the following information: (i) acceptance date of the articles, concerning OHS RACs, (ii) calculated number of days between the publications, (iii) corresponding time (in days), and (iii) the cumulative number of publications, all through the period of Jan. 2000 – Dec. 2019.

**Table S2.** Supplementary data to the article, which depict the: (i) acceptance date of the articles, concerning OHS RACs, (ii) calculated number of days between the publications, (iii) corresponding time (in days), and (iii) the cumulative number of publications, all through the period of Jan. 2000 – Dec. 2019.

| Acceptance Date of Articles | Number of Days (or time intervals) between successive publications<br>( $N_{dop}$ )<br>[ days ] | Corresponding time<br>( $t$ )<br>[ days ] | Cumulative number of publications<br>( $N_{cmp}$ ) |
|-----------------------------|-------------------------------------------------------------------------------------------------|-------------------------------------------|----------------------------------------------------|
| (i)                         | (ii)                                                                                            | (iii)                                     | (iv)                                               |
| 2/1/2000                    | 0                                                                                               | 0                                         | 0                                                  |
| 8/9/2000                    | 250                                                                                             | 250                                       | 1                                                  |
| 16/8/2001                   | 342                                                                                             | 592                                       | 2                                                  |
| 13/10/2001                  | 58                                                                                              | 650                                       | 3                                                  |
| 3/9/2002                    | 325                                                                                             | 975                                       | 4                                                  |
| 3/1/2003                    | 122                                                                                             | 1097                                      | 5                                                  |
| 4/9/2003                    | 244                                                                                             | 1341                                      | 6                                                  |
| 25/10/2004                  | 417                                                                                             | 1758                                      | 7                                                  |
| 10/4/2005                   | 167                                                                                             | 1925                                      | 8                                                  |
| 15/4/2006                   | 370                                                                                             | 2295                                      | 9                                                  |
| 1/9/2006                    | 139                                                                                             | 2434                                      | 10                                                 |
| 29/12/2006                  | 119                                                                                             | 2553                                      | 11                                                 |
| 16/1/2007                   | 18                                                                                              | 2571                                      | 12                                                 |
| 30/1/2007                   | 14                                                                                              | 2585                                      | 13                                                 |
| 15/5/2007                   | 105                                                                                             | 2690                                      | 14                                                 |
| 30/7/2007                   | 76                                                                                              | 2766                                      | 15                                                 |
| 25/3/2008                   | 239                                                                                             | 3005                                      | 16                                                 |
| 26/8/2008                   | 154                                                                                             | 3159                                      | 17                                                 |
| 15/1/2009                   | 142                                                                                             | 3301                                      | 18                                                 |
| 3/2/2009                    | 19                                                                                              | 3320                                      | 19                                                 |
| 11/6/2009                   | 128                                                                                             | 3448                                      | 20                                                 |
| 16/6/2009                   | 5                                                                                               | 3453                                      | 21                                                 |
| 6/2/2010                    | 235                                                                                             | 3688                                      | 22                                                 |
| 3/4/2010                    | 56                                                                                              | 3744                                      | 23                                                 |
| 14/12/2010                  | 255                                                                                             | 3999                                      | 24                                                 |
| 1/1/2011                    | 18                                                                                              | 4017                                      | 25                                                 |

|            |     |      |    |
|------------|-----|------|----|
| 1/1/2011   | 0   | 4017 | 26 |
| 8/3/2011   | 66  | 4083 | 27 |
| 5/5/2011   | 58  | 4141 | 28 |
| 21/7/2011  | 77  | 4218 | 29 |
| 2/8/2011   | 12  | 4230 | 30 |
| 24/9/2011  | 53  | 4283 | 31 |
| 10/11/2011 | 47  | 4330 | 32 |
| 19/12/2011 | 39  | 4369 | 33 |
| 1/1/2012   | 13  | 4382 | 34 |
| 18/2/2012  | 48  | 4430 | 35 |
| 9/4/2012   | 51  | 4481 | 36 |
| 6/5/2012   | 27  | 4508 | 37 |
| 6/5/2012   | 0   | 4508 | 38 |
| 12/9/2012  | 129 | 4637 | 39 |
| 21/10/2012 | 39  | 4676 | 40 |
| 1/11/2012  | 11  | 4687 | 41 |
| 1/1/2013   | 61  | 4748 | 42 |
| 28/2/2013  | 58  | 4806 | 43 |
| 27/3/2013  | 27  | 4833 | 44 |
| 8/5/2013   | 42  | 4875 | 45 |
| 28/9/2013  | 143 | 5018 | 46 |
| 1/1/2014   | 95  | 5113 | 47 |
| 27/1/2014  | 26  | 5139 | 48 |
| 19/2/2014  | 23  | 5162 | 49 |
| 3/3/2014   | 12  | 5174 | 50 |
| 12/7/2014  | 131 | 5305 | 51 |
| 9/9/2014   | 59  | 5364 | 52 |
| 12/1/2015  | 125 | 5489 | 53 |
| 28/1/2015  | 16  | 5505 | 54 |
| 12/2/2015  | 15  | 5520 | 55 |
| 19/2/2015  | 7   | 5527 | 56 |
| 22/2/2015  | 3   | 5530 | 57 |
| 18/4/2015  | 55  | 5585 | 58 |
| 22/5/2015  | 34  | 5619 | 59 |
| 11/6/2015  | 20  | 5639 | 60 |
| 17/7/2015  | 36  | 5675 | 61 |
| 31/7/2015  | 14  | 5689 | 62 |
| 6/8/2015   | 6   | 5695 | 63 |
| 10/1/2016  | 157 | 5852 | 64 |
| 18/1/2016  | 8   | 5860 | 65 |
| 30/4/2016  | 103 | 5963 | 66 |
| 7/6/2016   | 38  | 6001 | 67 |

|            |     |      |     |
|------------|-----|------|-----|
| 15/7/2016  | 38  | 6039 | 68  |
| 14/8/2016  | 30  | 6069 | 69  |
| 27/9/2016  | 44  | 6113 | 70  |
| 5/10/2016  | 8   | 6121 | 71  |
| 1/1/2017   | 88  | 6209 | 72  |
| 11/4/2017  | 100 | 6309 | 73  |
| 3/5/2017   | 22  | 6331 | 74  |
| 23/5/2017  | 20  | 6351 | 75  |
| 26/7/2017  | 64  | 6415 | 76  |
| 26/7/2017  | 0   | 6415 | 77  |
| 17/8/2017  | 22  | 6437 | 78  |
| 22/9/2017  | 36  | 6473 | 79  |
| 31/10/2017 | 39  | 6512 | 80  |
| 16/11/2017 | 16  | 6528 | 81  |
| 1/1/2018   | 46  | 6574 | 82  |
| 1/1/2018   | 0   | 6574 | 83  |
| 21/1/2018  | 20  | 6594 | 84  |
| 26/1/2018  | 5   | 6599 | 85  |
| 1/2/2018   | 6   | 6605 | 86  |
| 11/2/2018  | 10  | 6615 | 87  |
| 18/4/2018  | 66  | 6681 | 88  |
| 27/4/2018  | 9   | 6690 | 89  |
| 13/5/2018  | 16  | 6706 | 90  |
| 20/5/2018  | 7   | 6713 | 91  |
| 7/6/2018   | 18  | 6731 | 92  |
| 13/6/2018  | 6   | 6737 | 93  |
| 17/6/2018  | 4   | 6741 | 94  |
| 28/11/2018 | 164 | 6905 | 95  |
| 21/12/2018 | 23  | 6928 | 96  |
| 2/1/2019   | 12  | 6940 | 97  |
| 17/1/2019  | 15  | 6955 | 98  |
| 7/2/2019   | 21  | 6976 | 99  |
| 11/3/2019  | 32  | 7008 | 100 |
| 13/3/2019  | 2   | 7010 | 101 |
| 25/4/2019  | 43  | 7053 | 102 |
| 29/4/2019  | 4   | 7057 | 103 |
| 10/5/2019  | 11  | 7068 | 104 |
| 3/6/2019   | 24  | 7092 | 105 |
| 14/6/2019  | 11  | 7103 | 106 |
| 4/7/2019   | 20  | 7123 | 107 |
| 19/9/2019  | 77  | 7200 | 108 |
| 18/10/2019 | 29  | 7229 | 109 |
