# Supplementary material for: Risk-Acceptance Criteria in Occupational Health and Safety Risk-Assessment—The State-of-the-Art through a Systematic Literature Review
Source: MDPI journal article supplement (doi:10.3390/safety7040077), 2021-11-03
Supplement: s1 [file s1]

### Supplementary Material #C.

We present the results of the application of the PRISMA\_2020 Checklist (found in the link: <http://prisma-statement.org/PRISMAStatement/Checklist.aspx>) on our SRM approach.

**Table S3.** Supplementary data to the article, which depict the results of the application of the PRISMA\_2020 protocol on our SRM approach.

| Section/topic                 | #   | Checklist item                                                                                                                                                                                                                     | Authors' actions on the manuscript which are depicted by the following texts |
|-------------------------------|-----|------------------------------------------------------------------------------------------------------------------------------------------------------------------------------------------------------------------------------------|------------------------------------------------------------------------------|
| Title                         | 1   | We have identified the report as a systematic review                                                                                                                                                                               | <i>See the new Title</i>                                                     |
| <b>ABSTRACT</b>               |     |                                                                                                                                                                                                                                    |                                                                              |
| Structured summary            | 2   | We have provided a structured summary including, as applicable: background; objectives; data sources; study appraisal and synthesis methods; results; limitations; conclusions and implications of key findings; systematic review | <i>See the Abstract</i>                                                      |
| <b>INTRODUCTION</b>           |     |                                                                                                                                                                                                                                    |                                                                              |
| Rationale                     | 3   | We have described the rationale for the review in the context of what is already known                                                                                                                                             | <i>See the Introduction</i>                                                  |
| Objectives                    | 4   | We have provided an explicit statement of questions being addressed with reference to participants, interventions, comparisons, outcomes, and study design (PICOS).                                                                | <i>See the Introduction</i>                                                  |
| <b>METHODS</b>                |     |                                                                                                                                                                                                                                    |                                                                              |
| Eligibility criteria          | 5   | We have specified the inclusion and exclusion criteria for the review and how studies were grouped for the syntheses.                                                                                                              | <i>In Section 3 "Methodology": Table 4</i>                                   |
| Information sources           | 6   | We have specified all databases, registers, websites, organisations, reference lists and other sources searched or consulted to identify studies. Specify the date when each source was last searched or consulted.                | <i>(i) In Supplementary Material #A: Table A1<br/>(ii) In sections 4, 5</i>  |
| Search strategy               | 7   | We have presented the full search strategies for all databases, registers and websites, including any filters and limits used.                                                                                                     | <i>In Section 3 "Methodology": Table 4, Figure 8</i>                         |
| Selection process             | 8   | We have specified the method used to decide whether a study met the inclusion criteria of the review, including how many reviewers screened each record and each report retrieved, whether they worked independently.              | <i>In Section 3 "Methodology"</i>                                            |
| Data collection process       | 9   | We have specified the method used to collect data from reports, including how many reviewers collected data from each report, whether they worked independently.                                                                   | <i>In Section 3 "Methodology"</i>                                            |
| Data items                    | 10a | We list and define all outcomes for which data were sought.                                                                                                                                                                        | <i>In Supplementary Material #A: Table A1</i>                                |
|                               | 10b | We list and define all other variables for which data were sought.                                                                                                                                                                 | <i>In Supplementary Material #A: Table A1</i>                                |
| Study risk of bias assessment | 11  | We specify the method used to assess risk of bias in the included studies, including details of the tool(s) used, how many reviewers assessed each study and whether they worked independently.                                    | <i>In Section 3 "Methodology"</i>                                            |
| Effect measures               | 12  | We specify for the outcomes the effect measures used in the synthesis or presentation of results.                                                                                                                                  | <i>(i) In Section 3 "Methodology" we have denoted:</i>                       |

|                               |    |                                                                                                                                                                                                                      |                                                                                                                                                                                                                                                                                                                                             |
|-------------------------------|----|----------------------------------------------------------------------------------------------------------------------------------------------------------------------------------------------------------------------|---------------------------------------------------------------------------------------------------------------------------------------------------------------------------------------------------------------------------------------------------------------------------------------------------------------------------------------------|
|                               |    |                                                                                                                                                                                                                      | <p>We specify (by appropriate graphs) for the outcomes (depicted in the table of the Supplementary Material) the effect measures (e.g. percentages, trend, prediction, distribution) used in the synthesis of results</p> <p>(ii) In section 4 “Results”: Figures 9, 10, 11, 12, 13</p> <p>(iii) In Supplementary Material #A: Table A1</p> |
| Synthesis methods             | 13 | We describe the process to decide which studies were eligible (e.g. tabulating the study)                                                                                                                            | <p>(i) In Section 3 “Methodology”</p> <p>(ii) In Supplementary Material #A: Table A1</p>                                                                                                                                                                                                                                                    |
| Reporting bias assessment     | 14 | We describe a method used to report the risk of bias due to missing results                                                                                                                                          | In Section 3 “Methodology”                                                                                                                                                                                                                                                                                                                  |
| Certainty assessment          | 15 | We describe a method for assessing the certainty in the body of evidence for the outcomes.                                                                                                                           | In Section 4, we refer the usage of a stochastic process (the Poisson stochastic model) to estimate the evolution of the scientific interest about OHS-RACs                                                                                                                                                                                 |
| <b>RESULTS</b>                |    |                                                                                                                                                                                                                      |                                                                                                                                                                                                                                                                                                                                             |
| Study selection               | 16 | We present the results of the search and selection process, from the number of records identified in the search to the number of studies included in the review                                                      | They are presented in Section 3, in Table 4 and in Table A1 (Supplementary Material)                                                                                                                                                                                                                                                        |
| Study characteristics         | 17 | We cite each included study and present its characteristics.                                                                                                                                                         | The citations are presented in Table A1 (Supplementary Material) and in the section of “References”                                                                                                                                                                                                                                         |
| Risk of bias in studies       | 18 | We do not present assessments of risk of bias for each included study.                                                                                                                                               | Not applicable                                                                                                                                                                                                                                                                                                                              |
| Results of individual studies | 19 | For all outcomes, we present, for each study: (a) a summary statistics for each group (where appropriate), (b) a summary of features, and (b) an effect estimate and its precision using structured tables or plots. | <p>(ii) In Section 4 “Methodology”</p> <p>(iii) In section 4 “Results”: Figures 9, 10, 11, 12, 13, 14</p> <p>(iv) In Supplementary Material #A: Table A1</p>                                                                                                                                                                                |
| Results of syntheses          | 20 | For each synthesis, we briefly tabulate the characteristics among contributing studies.                                                                                                                              | In Supplementary Material #A: Table A1                                                                                                                                                                                                                                                                                                      |
| Reporting biases              | 21 | We do not present assessments of risk of bias due to missing results for each synthesis assessed.                                                                                                                    | Not applicable                                                                                                                                                                                                                                                                                                                              |
| Certainty of evidence         | 22 | We present assessments of certainty in the body of evidence for the outcomes                                                                                                                                         | In Section 4, we refer the usage of a stochastic process (the Poisson stochastic model) to estimate the evolution of the scientific interest about OHS-RACs, while in Figure 10 we present the assessment results                                                                                                                           |
| <b>DISCUSSION</b>             |    |                                                                                                                                                                                                                      |                                                                                                                                                                                                                                                                                                                                             |
| Limitations                   | 23 | We discuss the limitations in the study: (i) of the review processes used, (ii) of the evidence included in the review                                                                                               | In section 5 “Discussion”                                                                                                                                                                                                                                                                                                                   |
| <b>OTHER INFORMATION</b>      |    |                                                                                                                                                                                                                      |                                                                                                                                                                                                                                                                                                                                             |
| Registration and protocol     | 24 | The review was not registered                                                                                                                                                                                        |                                                                                                                                                                                                                                                                                                                                             |
| Support (FUNDING)             | 25 | We denote in the article that this research received no external funding.                                                                                                                                            | Funding: This research received no external funding.                                                                                                                                                                                                                                                                                        |
| Competing interests           | 26 | We declare that there was not any competing interests of review authors                                                                                                                                              | In Section 3 “Methodology”                                                                                                                                                                                                                                                                                                                  |
| Availability of data,         | 27 | We declare the data used for the analysis, and for                                                                                                                                                                   | In Section 3 “Methodology”                                                                                                                                                                                                                                                                                                                  |

|                          |  |                                                                                |  |
|--------------------------|--|--------------------------------------------------------------------------------|--|
| code and other materials |  | the graphs, and also any material used in the review, are available to any one |  |
|--------------------------|--|--------------------------------------------------------------------------------|--|
