# Supplementary material for: Risk-Acceptance Criteria in Occupational Health and Safety Risk-Assessment—The State-of-the-Art through a Systematic Literature Review
Source: MDPI journal article supplement (doi:10.3390/safety7040077), 2021-11-03
Supplement: s1 [file s1 › Supplementary Material_A__Table S1_final.xlsx]

## Sheet: RACs Articles
Supplementary Material #A. Table Α1 depicts the categorization results of 110 articles [29,50,62-169] which are related with OHS RACs for the period of Jan. 2000 – Dec. 2019
Table S1. Results of the categorization of 110 articles [29,50,62-169] regarding OHS RACs all through the period of yrs 2000–2019.
Enumeration	Article's title	Authors	Year of Publication	Acceptance Date	Descriptive features of RACs	Categorization of RACs	Kind of the methodology of approaching RACs	Type of RAC	RAA Technique's Name	Type of RAA Technique	Type of article's data/material	Field of RACs application	Source/Journal	Notes	Importance	Publisher			References'-List Nr
	(A)	(B)	( C )	(D)	(E)	(F)	(G)	(H)	(I)	(J)	(K)	(L)	(M)			(N)			(O)
1	A decision-making framework to reduce the risk of collisions between ships and whales	Sèbe, M., Kontovas, C.A., Pendleton, L.	2019	2019-09-19	FSA with C-B RAC to assess measures to reduce the risk of collisions between ships and whales.	Quantitative	Theoretical	C-B RAC	FSA	Quantitative	Theoretical Foundations	Transportations	Marine Policy			Elsevier			62
2	Methodology of exergy-based economic analysis incorporating safety investment cost for comparative evaluation in process plant design	Noh, Y., Chang, D.	2019	2019-06-03	QRA with C-B RAC in process plant design	Quantitative	Algorithm	C-B RAC	QRA	Quantitative	Theoretical Foundations	Engineering	Energy			Elsevier			63
3	Quantitative risk assessment of the interior of a hydrogen refueling station considering safety barrier systems	Tsunemi, K., Kihara, T., Kato, E., Kawamoto, A., Saburi, T.	2019	2019-07-04	QRA with I-R RAC in a hydrogen refueling station	Quantitative	Algorithm, Theoretical	I-R RAC	QRA	Quantitative	Case Study, Theoretical Foundations	Engineering	International Journal of Hydrogen Energy			Elsevier			64
4	Defining ALARP for fire safety engineering design via the Life Quality Index	Van Coile, R., Jomaas, G., Bisby, L.	2019	2019-04-29	Probabilistic Risk Assessment (PRA) with S-R RAC and C-B RAC for ALARP in fire engineering	Quantitative	Algorithm, Case Study, Theoretical	C-B RAC, S-R RAC	PRA	Quantitative	Case Study, Theoretical Foundations	Engineering	Fire Safety Journal			Elsevier			65
5	The Need for Hierarchies of Acceptance Criteria for Probabilistic Risk Assessments in Fire Engineering	Van Coile, R., Hopkin, D., Lange, D., Jomaas, G., Bisby, L.	2019	2018-06-13	Probabilistic Risk Assessment (PRA) with S-R RAC and C-B RAC in fire engineering	Hybrid	Algorithm, Case Study, Theoretical	C-B RAC, S-R RAC	PRA	Quantitative	Theoretical Foundations	Engineering	Fire Technology			Springer			66
6	Does risk information change the acceptance of hydrogen refueling stations in the general Japanese population?	Ono, K., Kato, E., Tsunemi, K.	2019	2019-04-25	S-R RACs used in hydrogen refueling stations	Qualitative	Theoretical	S-R RAC	Interview survey	Qualitative	Theoretical Foundations	Industry	International Journal of Hydrogen Energy			Elsevier			67
7	Macro risk: A versatile and universal strategy for measuring the overall safety of hazardous industrial installations in China	Wang, G., Pei, J.	2019	2019-05-10	ENV RACs and C-B RACs used in a probabilistic RAA method	Qualitative	Theoretical	C-B RAC, ENV RAC	A probabilistic RAA method	Qualitative, Quantitative	Theoretical Foundations	Industry	International Journal of Environmental Research and Public Health			MDPI			68
8	The effect of population age on the acceptable safety of self-driving vehicles	Liu, P., Zhang, Y., He, Z.	2019	2019-01-02	I-R RACs used in self-driving vehicles	Qualitative	Theoretical	I-R RAC	An expressed-preference approach	Qualitative	Theoretical Foundations	Transportations	Reliability Engineering and System Safety			Elsevier			69
9	Quantification of a safety target for an underground CNG bus terminal in Stockholm	Lundin, J.	2019	2019-01-17	I-R RACs and S-R RACs used in underground CNG bus terminal	Quantitative	Case Study, Theoretical	I-R RAC, S-R RAC	A comparative method using RACs	Qualitative	Case Study, Theoretical Foundations	Industry, Transportations	Fire Safety Journal			Elsevier			70
10	How Safe Is Safe Enough for Self-Driving Vehicles?	Liu, P., Yang, R., Xu, Z.	2019	2019-02-07	Tolerable RAC and Broadly Acceptable RAC in driving Vehicles	Quantitative	Theoretical	Other	An expressed-preference approach	Qualitative	Theoretical Foundations	Industry, Transportations	Risk Analysis			Wiley			71
11	Risk-based decision making and the calibration of structural design codes–prospects and challenges	Köhler, J., Baravalle, M.	2019	2019-06-14	C-B RACs used in semi-probabilistic and probabilistic RAA methods	Quantitative	Theoretical	C-B RAC	A semi-probabilistic and probabilistic RAA approach	Qualitative	Theoretical Foundations	Constructions	Civil Engineering & Environmental Systems			Taylor & Francis			72
12	An engineer-based methodology to perform Explosion Risk Analyses	Paris, L.	2019	2018-12-21	RACs used in Explosion Risk Analyses (ERA) and Quantitative risk assessment (QRA)	Quantitative	Theoretical	Other	QRA	Quantitative	Theoretical Foundations	Engineering	Journal of Loss Prevention in the Process Industries			Elsevier			73
13	Risk assessment system for oil and gas pipelines laid in one ditch based on quantitative risk analysis	Zhang, P., Qin, G., Wang, Y.	2019	2019-03-13	Fuzzy bow-tie model combined with RACs used in QRA for Oil/Gas pipelines	Quantitative	Theoretical	Other	QRA	Quantitative	Case Study, Theoretical Foundations	Engineering	Energies			MDPI			74
14	Comparative analysis of the maritime venture risk and the cost of averting a fatality in the republic of croatia	Medić, D., Lušić, Z., Bošnjak, R.	2019	2019-03-11	Formal Safety Assessment (FSA) with C-B RACs used in Maritime Venture Risk	Quantitative	Theoretical	C-B RAC	FSA	Quantitative	Case Study, Theoretical Foundations	Engineering	Nase More			Croatian Publisher			75
15	Can multi-use of the sea be safe? A framework for risk assessment of multi-use at sea	van Hoof, L., van den Burg, S.W.K., Banach, J.L., Röckmann, C., Goossen, M.	2019	2019-10-18	RACs used in a common framework for the risk assessment of multi-use at sea	Qualitative	Theoretical	Other	A common framework for the risk assessment	Qualitative	Theoretical Foundations	Engineering	Ocean and Coastal Management			Elsevier			76
16	Screening-level risk assessment of a hydrogen refueling station that uses organic hydride	Tsunemi, K., Yoshida, K., Kihara, T., Saburi, T., Ono, K.	2018	2018-11-28	I-R RACs used in a Screening-Level Risk Assessment of a Hydrogen Refueling Station	Quantitative	Theoretical	I-R RAC	A Screening-Level Risk Assessment of a Hydrogen Refueling Station	Qualitative	Theoretical Foundations	Chemical Sector	Sustainability (Switzerland)			MDPI			77
17	Societal risk acceptance criteria for pressure pipelines in China	Pei, J., Wang, G., Luo, S., Luo, Y.	2018	2018-05-13	S-R RAC used in a regressive accident-data analysis for pressure pipelines	Qualitative	Theoretical	S-R RAC	A historical accident-data analysis via linear regression	Qualitative	Theoretical Foundations	Engineering	Safety Science			Elsevier			78
18	Risk-based target reliability indices for quay walls	Roubos, A.A., Steenbergen, R.D.J.M., Schweckendiek, T., Jonkman, S.N.	2018	2018-06-17	RACs used in Risk-based target reliability indices	Quantitative	Theoretical	C-B RAC, ENV RAC, I-R RAC, S-R RAC, Other	Risk-based target reliability indices	Quantitative	Theoretical Foundations	Constructions	Structural Safety			Elsevier			79
19	Probabilistic modelling of the hull girder target safety level of tankers	Guia, J., Teixeira, A.P., Guedes Soares, C.	2018	2018-04-27	C-B RAC used in a Probabilistic modelling	Qualitative	Theoretical	C-B RAC	Probabilistic Modelling	Qualitative	Theoretical Foundations	Industry (Maritime)	Marine Structures			Elsevier			80
20	A Practical Method for the Evaluation of Societal Risk in the Context of the International Maritime Organization's Safety Level Approach	Sun, M., Zheng, Z., Gang, L.	2018	2018-01-21	I-R and S-R RACs used in Safety Level Approach (SLA)	Quantitative	Theoretical	I-R RAC, S-R RAC	SLA	Quantitative	Theoretical Foundations	Industry (Maritime)	Journal of Navigation			The Royal Institute of Navigation			81
21	A method for facility layout optimisation including stochastic risk assessment	Brunoro Ahumada, C., Quddus, N., Mannan, M.S.	2018	2018-06-07	I-R RAC used in a Quantitative risk assessment (QRA)	Quantitative	Case Study, Theoretical	I-R RAC	QRA, Stochastic risk assessment	Quantitative	Case Study, Theoretical Foundations	Industry	Process Safety and Environmental Protection			Elsevier			82
22	Safety assessment of crude oil tankers	Vidmar, P., Perkovič, M.	2018	2018-02-11	ALAPR, F-N diagram, PLL (potential loss of lives), PLC (potential loss of containment), PLP (potential loss of property)	Quantitative	Statistical	S-R RAC, Other	FSA	Quantitative	Empirical Data	Industry (Oil & Gas)	Safety Science			Elsevier			83
23	Land-use planning risk estimates for a chemical industrial park in China – A longitudinal study	Hu, X., Wu, Z., Hedlund, F.H., Pedersen, J.B., Wang, R., Duo, Y., Sin, G.	2018	2018-04-18	I-R RAC and S-R RAC used in a Quantitative risk assessment (QRA)	Quantitative	Case Study, Theoretical	I-R RAC, S-R RAC	QRA	Quantitative	Case Study, Theoretical Foundations	Chemical Sector	Process Safety Progress			American Institute of Chemical Engineers (AIChE)			84
24	A risk assessment method of deep excavation based on Bayesian analysis and expert elicitation	Wang, N., Xu, C.-S., Du, X.-L., Zhang, M.-J.	2018	2017-11-16	R-M RAC used in Deep excavation safety risk (DESR)	Quantitative	Case Study, Theoretical	R-M RAC	DESR	Quantitative	Case Study, Theoretical Foundations	Constructions	International Journal of Systems Assurance Engineering and Management			Springer			85
25	Uncertainty analysis of the estimated risk in formal safety assessment	Sun, M., Zheng, Z., Gang, L.	2018	2018-01-26	S-R RAC used in Formal safety assessment (FSA)	Quantitative	Case Study, Theoretical	S-R RAC	FSA	Quantitative	Case Study, Theoretical Foundations	Transportations	Sustainability (Switzerland)			MDPI			86
26	Consistency and stability of risk indicators: The case of road infrastructures	Rossi, G., Lombardi, M., Di Mascio, P.	2018	2018-01-01	I-R RAC and S-R RAC used in a Quantitative risk assessment (QRA)	Quantitative	Case Study, Theoretical	I-R RAC, S-R RAC	QRA	Quantitative	Case Study, Theoretical Foundations	Transportations	International Journal of Safety and Security Engineering			WIT Press			87
27	Risk assessment and reduction for an innovative subsurface well completion system	Zhen, X., Moan, T., Gao, Z., Huang, Y.	2018	2018-05-20	ENV RAC, C-B RAC and S-R RAC used in a Quantitative risk assessment (QRA)	Quantitative	Theoretical	C-B RAC, ENV RAC, S-R RAC	QRA	Quantitative	Theoretical Foundations	Industry (Oil & Gas)	Energies			MDPI			88
28	Human safety criteria for risk-based structural design	Sykora, M., Holicky, M., Jung, K., Diamantidis, D.	2018	2018-02-01	I-R RAC, S-R RAC, C-B RAC used in risk-based structural design	Quantitative	Case Study, Theoretical	C-B RAC, I-R RAC, S-R RAC, Other	A risk-based structural design	Quantitative	Case Study, Theoretical Foundations	Constructions, Transportations	International Journal of Safety and Security Engineering			WIT Press			89
29	Using the ALARP principle for safety management in the energy production sector of chemical industry	Abrahamsen, E.B., Abrahamsen, H.B., Milazzo, M.F., Selvik, J.T.	2018	2017-08-17	C-B RAC and S-R RAC used in a Quantitative risk assessment (QRA)	Quantitative	Theoretical	C-B RAC, S-R RAC	QRA	Quantitative	Theoretical Foundations	Industry, Chemical Sector	Reliability Engineering and System Safety			Elsevier			90
30	The application of Bayesian – Layer of Protection Analysis method for risk assessment of critical subsea gas compression systems	Ifelebuegu, A.O., Awotu-Ukiri, E.O., Theophilus,, S.C., Arewa, A.O., Bassey, E.	2018	2017-10-31	I-R RAC used in a Layer of Protection Analysis (LOPA) and in Bayesian	Quantitative	Case Study, Theoretical	I-R RAC	Layer of Protection Analysis (LOPA), Bayesian Networks	Quantitative	Case Study, Theoretical Foundations	Industry, Chemical Sector	Process Safety and Environmental Protection			Elsevier			91
31	Bayesian network application for the risk assessment of existing energy production units	Sýkora, M., Marková, J., Diamantidis, D.	2018	2017-09-22	I-R RAC, S-R RAC used in energy production units	Quantitative	Theoretical	I-R RAC, S-R RAC	Bayesian Networks	Quantitative	Case Study	Industry (Energy Production)	Reliability Engineering and System Safety		MEDIUM	Elsevier			92
32	Framework for developing risk to life evaluation criteria associated with landslides in Canada	Macciotta, R., Lefsrud, L.	2018	2018-01-01	I-R RAC, S-R RAC used in geoenvironmental hazards	Qualitative, Quantitative	Theoretical	I-R RAC, S-R RAC	QRA	Qualitative, Quantitative	Theoretical Foundations	Engineering	Geoenvironmental Disasters			Springer			93
33	Creating risk management strategies based on uncertain assumptions and aspects from assumption-based planning	Berner, C.L., Flage, R.	2017	2017-05-03	I-R RAC used in an Bow-Tie method	Quantitative	Theoretical	I-R RAC	Bow-Tie	Quantitative	Theoretical Foundations	Industry, Chemical Sector	Reliability Engineering and System Safety			Elsevier			94
34	Derivation of a societal risk acceptance criterion for major accident hazard installations in Sri Lanka	De Silva, K.G.V.K., Gunasekera, M.Y., De Alwis, A.A.P.	2017	2017-07-26	C-B RAC and S-R RAC used in a preventing major accident hazards (MAH) in chemical industrial installations	Quantitative	Theoretical	C-B RAC, S-R RAC	Μajor accident hazards (MAH) analysis	Quantitative	Theoretical Foundations	Industry, Chemical Sector	Process Safety and Environmental Protection			Elsevier			95
35	Methodology for Establishing Risk Criteria for Dams in Developing Countries, Case Study of China	Ge, W., Li, Z., Liang, R.Y., Li, W., Cai, Y.	2017	2017-05-23	C-B RAC and S-R RAC used in dams	Quantitative	Theoretical	C-B RAC, S-R RAC	Other	Quantitative	Theoretical Foundations	Constructions	Water Resour Manage			Springer			96
36	Classification of risk acceptability and risk tolerability factors in occupational health and safety	Tchiehe, D.N., Gauthier, F.	2017	2016-10-05	RACs in OHS	Qualitative	Theoretical	C-B RAC, ENV RAC, I-R RAC, S-R RAC, Other	Other	Qualitative	Theoretical Foundations	All fields	Safety Science			Elsevier			97
37	Optimization, a rational approach to SIL determination	Jahanian, H.	2017	2017-04-11	C-B RAC and S-R RAC used in process industry	Quantitative	Theoretical	C-B RAC, S-R RAC	Other	Quantitative	Theoretical Foundations	Industry	Process Safety and Environmental Protection			Elsevier			98
38	HazMat transportation risk assessment: A revisitation in the perspective of the Viareggio LPG accident	Landucci, G., Antonioni, G., Tugnoli, A., Bonvicini, S., Molag, M., Cozzani, V.	2017	2016-08-14	S-R RAC used in HazMat transportations	Quantitative	Statistical	S-R RAC	HazMat transportation risk analysis (TRA)	Qualitative, Quantitative	Accident Data	Transportations	Journal of Loss Prevention in the Process Industries		LOW	Elsevier			99
39	An evaluation of a risk-based environmental regulation in Brazil: Limitations to risk management of hazardous installations	Naime, A.	2017	2017-07-26	S-R RAC used in chemical industrial installations	Quantitative	Theoretical	S-R RAC	Risk measures of societal risk (SRE)	Quantitative	Accident Data	Industry, Chemical Sector	Environmental Impact Assessment Review			Elsevier			100
40	Port Risk Management in Container Terminals	Pallis, P.L.	2017	2017-01-01	C-B RAC and S-R RAC used in port container terminals	Quantitative	Statistical	C-B RAC, S-R RAC	Port Risk Assessment (PRA)	Qualitative, Quantitative	Empirical Data	Constructions	Transportation Research Procedia			Elsevier			101
41	On risk assessment and risk acceptance of dangerous goods transportation through road tunnels in Greece	Benekos, I., Diamantidis, D.	2017	2016-07-15	S-R RAC used in transportations	Quantitative	Graphical	S-R RAC	Semi-quantitative risk matrix approach, Quantitative World Road Association’s (PIARC) Risk Assessmen Model (QRAM)	Hybrid	Accident Data	Transportations	Safety Science		HIGH	Elsevier			102
42	Total Safety Management- Principles	Kontogiannis, T., Leva, M.C., Balfe, N.	2017	2016-09-27	I-R RACs in OHS	Quantitative	Theoretical	I-R RAC	The Total Operations Management for Safety Critical Activities, Computerised Barrier Management System (CBMS)	Quantitative	Empirical Data	Industry	Safety Science	basically talking about Risk Management Method	LOW	Elsevier			103
43	Risk measures on networks and expected utility	Cerqueti, R., Lupi, C.	2016	2016-04-30	RACs in networks	Quantitative	Theoretical	Other	Other	Quantitative	Theoretical Foundations	All fields	Reliability Engineering and System Safety			Elsevier			104
44	SIL determination as a utility-based decision process	Jahanian, H., Mahboob, Q.	2016	2016-06-07	C-B RAC and S-R RAC used in process industry	Quantitative	Theoretical	C-B RAC, S-R RAC	Other	Quantitative	Theoretical Foundations	Industry	Process Safety and Environmental Protection			Elsevier			105
45	Safety regulations-Implications of the new risk perspectives	Aven, T., Ylönen, M.	2016	2016-01-10	Knowledge-based RAC instead of probability-based RAC	Quantitative	Theoretical	Other	QRA, PRA	Quantitative	Theoretical Foundations	Industry (Oil & Gas)	Reliability Engineering and System Safety	See Appendix Adopting the new risk perspectives, it is acknowledged that to adequately describe risk, probability numbers alone are not enough: we always have to add the (strength of) knowledge that the probabilities are based on	HIGH	Elsevier			106
46	A cost–benefit analysis of mitigation options for optimal management of risks posed by flow-like phenomena	Narasimhan, H., Ferlisi, S., Cascini, L., De Chiara, G., Faber, M.H.	2016	2015-04-18	C-B RAC and S-R RAC used in OHS	Quantitative	Theoretical	C-B RAC, S-R RAC	Other	Quantitative	Theoretical Foundations	All fields	Natural Hazards			Springer			107
47	Methodology for determining the risk acceptance criteria for the Seveso establishments	Golob, S., Kožuh, M.	2016	2016-01-18	RACs used in process industry	Quantitative	Theoretical	Other	Other	Quantitative	Theoretical Foundations	Industry	Process Safety and Environmental Protection			Elsevier			108
48	Methodological approach for safety assessment of cruise ship in port	Vidmar, P., Perkovič, M.	2015	2015-07-17	RACs used in cruise ships	Quantitative	Case Study, Theoretical	S-R RAC	Probabilistic Modelling	Quantitative	Case Study, Theoretical Foundations	Transportations	Safety Science			Elsevier			109
49	Defining risk acceptance criteria in occupational settings: A case study in the furniture industrial sector	Rodrigues, M.A., Arezes, P.M., Leão, C.P.	2015	2015-08-06	Cumulative Distribution Function (CDF), Burr Distribution, ALARP	Quantitative	Case Study, Statistical, Theoretical	S-R RAC	ALARP, DMRA	Quantitative	Case Study, Theoretical Foundations	Industry (Furniture)	Safety Science		HIGH	Elsevier			110
50	Ambiguity in risk assessment	Johansen, I.L., Rausand, M.	2015	2015-07-31	RACs used in RAA	Quantitative	Theoretical	Other	Other	Quantitative	Theoretical Foundations	All fields	Safety Science		HIGH	Elsevier			111
51	Study of risk acceptance criteria for dams	Li, S.Y., Zhou, X.B., Wang, Y.J., Zhou, J.P., Du, X.H., Chen, Z.Y.	2015	2015-05-22	I-R RAC, S-R RAC, C-B RAC used in Dams	Quantitative	Case Study, Theoretical	C-B RAC, I-R RAC, S-R RAC	-	Quantitative	Theoretical Foundations	Constructions	Science China Technological Sciences			Springer			112
52	A framework for risk analysis of maritime transportation systems: A case study for oil spill from tankers in a ship–ship collision	Goerlandt, F., Montewka, J.	2015	2015-02-12	S-R RAC used in tanker-ships	Qualitative, Quantitative	Case Study, Theoretical	S-R RAC	Bayesian Networks, Qualitative multi-criteria evidence assessment, Alternative Hypothesis	Qualitative, Quantitative	Case Study, Theoretical Foundations	Transportations	Safety Science		LOW	Elsevier			113
53	Investment into Human Risks in Railways and Decision Optimization	Mahboob, Q., Schöne, E., Maschek, U., Trinckauf, J.	2015	2014-09-09	S-R RAC used in railways	Quantitative	Case Study, Theoretical	S-R RAC	Bayesian Networks	Quantitative	Theoretical Foundations	Transportations	Human & Ecological Risk Assessment			Taylor & Francis			114
54	On a novel method for approximation of FN diagram and setting ALARP borders	Kaneko, F., Arima, T., Yoshida, K., Yuzui, T.	2015	2015-01-12	S-R RAC by FN diagramms in ALARP	Quantitative	Theoretical	S-R RAC	ALARP	Quantitative	Theoretical Foundations	All fields	Journal of Marine Science and Technology (Japan)			Springer			115
55	Is there a tolerable level of risk from natural hazards in New Zealand?	Enright, P.A.	2015	2015-01-28	I-R RAC used in natural hazards	Quantitative	Theoretical	I-R RAC	Other	Quantitative	Theoretical Foundations	Engineering	Georisk			Taylor & Francis			116
56	Hydrogen safety risk assessment methodology applied to a fluidized bed membrane reactor for autothermal reforming of natural gas	Psara, N., Van Sint Annaland, M., Gallucci, F.	2015	2015-06-11	S-R RAC used in autothermal reforming of natural gas for hydrogen production	Quantitative	Case Study, Theoretical	S-R RAC	HAZID, FTA, ETA	Quantitative	Theoretical Foundations	Industry (Chemical Process)	International Journal of Hydrogen Energy			Elsevier			117
57	Individual and societal risk assessment for a petroleum oil storage terminal	Gurjar, B.R., Sharma, R.K., Ghuge, S.P., Wate, S.R., Agrawal, R.	2015	2015-02-19	I-R RAC, S-R RAC used in Petroleum Oil Storage Terminal	Quantitative	Case Study, Theoretical	I-R RAC, S-R RAC	ALARP	Quantitative	Theoretical Foundations	Industry (Oil & Gas)	Journal of Hazardous, Toxic, and Radioactive Waste			American Society of Civil Engineers (ASCE)			118
58	Recommendations on the use and design of risk matrices	Duijm, N.J.	2015	2015-02-22	R-M RAC used in OHS	Quantitative	Theoretical	R-M RAC	DMRA	Quantitative	Theoretical Foundations	All fields	Safety Science			Elsevier			119
59	Foundations and choice of risk metrics	Johansen, I.L., Rausand, M.	2014	2013-09-28	C-B RAC, ENV RAC, I-R RAC, S-R RAC in Risk Metrics	Quantitative	Case Study, Theoretical	C-B RAC, ENV RAC, I-R RAC, S-R RAC	Bow-Tie	Qualitative, Quantitative	Case Study, Theoretical Foundations	All fields	Safety Science			Elsevier			120
60	Safety systems design of VOC recovery process based on HAZOP and LOPA	Lee, S., Chang, D.	2014	2014-01-27	RACs in volatile organic compounds	Qualitative	Case Study, Theoretical	I-R RAC	HAZOP	Qualitative	Case Study, Theoretical Foundations	Industry (Oil & Gas)	Process Safety Progress			American Institute of Chemical Engineers (AIChE)			121
61	An individual risk assessment framework for high-pressure natural gas wells with hydrogen sulphide, applied to a case study in China	Xu, J.-H., Fan, Y.	2014	2014-02-19	I-R RAC for high-pressure natural gas	Quantitative	Case Study, Theoretical	I-R RAC	QRA	Quantitative	Theoretical Foundations	Industry (Chemical Process)	Safety Science			Elsevier			122
62	Risk-based management of occupational safety and health in the construction industry	Sousa, V., Almeida, N.M., Dias, L.A	2014	2014-03-03	I-R RAC, S-R RAC used in OHS	Quantitative	Theoretical	I-R RAC, S-R RAC	Occupational Safety and Health Potential Risk Management (OSH-PRM)	Quantitative	Empirical Data	Constructions	Safety Science	Theorry….	LOW	Elsevier			123
63	Quantitative risk assessment of the Italian gas distribution network	Vianello, C., Maschio, G.	2014	2014-07-12	I-R RAC, S-R RAC used in gas distribution network	Quantitative	Theoretical	I-R RAC, S-R RAC	QRA	Quantitative	Accident Data	Industry (Oil & Gas)	Journal of Loss Prevention in the Process Industries		MEDIUM	Elsevier			124
64	Risk Criteria in Occupational Environments-Critical Overview and Discussion	Rodrigues, M.A.; Arezes, P.; Leao, C.P.	2014	2014-01-01	I-R RAC, S-R RAC used in OHS	Qualitative, Quantitative	Theoretical	I-R RAC, S-R RAC	Other	Qualitative, Quantitative	Empirical Data	All Fields	Procedia - Social and Behavioral Sciences	Δυσκολίες για τον προσδιορισμό των Risk Acceptance Criteria General Μπορεί να χρησιμοποιηθεί για εισαγωγή, θεωρία…	HIGH	Elsevier			125
65	HAZOP - Local approach in the Mexican oil & gas industry	Pérez-Marín, M., Rodríguez-Toral, M.A.	2013	2013-03-27	RACs used in oil & gas industry	Qualitative	Case Study, Theoretical	I-R RAC	HAZOP	Qualitative	Case Study, Theoretical Foundations	Industry (Oil & Gas)	Journal of Loss Prevention in the Process Industries			Elsevier			126
66	On the assessment of marginal life saving costs for risk acceptance criteria	Fischer, K., Virguez, E., Sánchez-Silva, M., Faber, M.H.	2013	2013-05-08	S-R RAC used in assessment of marginal life saving costs	Quantitative	Theoretical	S-R RAC	Other	Quantitative	Theoretical Foundations	All fields	Structural Safety			Elsevier			127
67	Practical aspects of risk acceptance criteria development in maritime shipping	Abramowicz-Gerigk, T., Burciu, Z., Kaminski, P.	2013	2013-01-01	S-R RAC used in maritime shipping	Quantitative	Theoretical	S-R RAC	ALARP	Quantitative	Theoretical Foundations	Industry (Maritime)	Journal of Konbin			Sciendo			128
68	A practical approach for the evaluation of acceptable risk in road tunnels	Abrahamsen, E.B., Røed, W., Jongejan, R.	2013	2012-10-21	I-R RAC, S-R RAC used in road tunnels	Quantitative	Theoretical	I-R RAC, S-R RAC	Other	Quantitative	Theoretical Foundations	Constructions	Journal of Risk Research			Taylor & Francis			129
69	Assessing the Consequences from Marine Accidents: Introduction to a Risk Acceptance Criterion for Greece	Ventikos, N.P., Giannopoulos, I.F.	2013	2013-02-28	C-B RAC, S-R RAC used in the maritime transport industry			C-B RAC, S-R RAC	ALARP	Quantitative	Theoretical Foundations	Transportations	Human & Ecological Risk Assessment			Taylor & Francis			130
70	Investigation of possible societal risk associated with wind power generation systems	Moura Carneiro, F.O., Barbosa Rocha, H.H., Costa Rocha, P.A.	2013	2012-11-01	S-R RAC used in wind power generation systems	Quantitative	Theoretical	S-R RAC	ALARP	Quantitative	Theoretical Foundations	Industry (Energy Production)	Renewable and Sustainable Energy Reviews			Elsevier			131
71	The quantitative risk assessment of a hydrogen generation unit	Jafari, M.J., Zarei, E., Badri, N.	2012	2012-09-12	I-R RAC, S-R RAC used in hydrogen generation	Quantitative	Theoretical	C-B RAC, S-R RAC	QRA, ALARP	Quantitative	Theoretical Foundations	Industry	International Journal of Hydrogen Energy			Elsevier			132
72	Cost-effectiveness of measures as a basis for safety decisions | [Kosten-wirksamkeit von maßnahmen als basis für sicherheitsentscheidungen]	Fermaud, C., Malioka, V., Frenzl, W.	2012	2012-01-01	C-B RAC used in tunnels' safety	Qualitative	Theoretical	C-B RAC	Other	Qualitative	Theoretical Foundations	Industry	Geomechanik und Tunnelbau			Ernst & Sohn Verlag für Architektur und technische Wissenschaften GmbH & Co			133
73	Risk assessment for structural design criteria of FPSO systems. Part I: Generic models and acceptance criteria	Faber, M.H., Straub, D., Heredia-Zavoni, E., Montes-Iturrizaga	2012	2012-05-06	C-B RAC, S-R RAC used in the oil-industry	Quantitative	Theoretical	C-B RAC, S-R RAC	Bayesian Networks, ALARP, QRA	Quantitative	Theoretical Foundations	Industry (Oil & Gas)	Marine Structures			Elsevier			134
74	Risk assessment for structural design criteria of FPSO systems. Part II: Consequence models and applications to determination of target reliabilities	Heredia-Zavoni, E., Montes-Iturrizaga, R., Faber, M.H., Straub, D.	2012	2012-05-06	C-B RAC, S-R RAC used in the oil-industry	Quantitative	Theoretical	C-B RAC, S-R RAC	Bayesian Networks, ALARP, QRA	Quantitative	Theoretical Foundations	Industry (Oil & Gas)	Marine Structures			Elsevier			135
75	Ethics and fundamental principles of risk acceptance criteria	Vanem, E.	2012	2011-12-19	C-B RAC, I-R RAC, S-R RAC used in OHS	Quantitative	Graphical, Theoretical	C-B RAC, I-R RAC, S-R RAC	FSA, ALARP	Quantitative	Theoretical foundations	Industry (Maritime)	Safety Science	Risk Acceptance Criteria General Μπορεί να χρησιμοποιηθεί για εισαγωγή, θεωρία… Δεν αναφέρεται σε Occupancy Safety αλλα σε General Public Example for Maritime	HIGH	Elsevier			136
76	Robust analysis of cost-effectiveness in formal safety assessment	Puisa, R., Vassalos, D.	2012	2012-02-18	C-B RAC used in the maritime transport industry	Quantitative	Theoretical	C-B RAC	FSA	Quantitative	Theoretical foundations	Industry (Maritime)	Journal of Marine Science and Technology (Japan)			Springer			137
77	New risk acceptance criteria for process safety	Moseman, J.	2012	2011-08-02	I-B RAC, S-R RAC used in the oil-industry	Quantitative	Theoretical	I-B RAC, S-R RAC	Process hazard analysis (PHA), HAZOP	Quantitative	Theoretical foundations	Industry (Oil & Gas)	Process Safety Progress			American Institute of Chemical Engineers (AIChE)			138
78	Abrahamsen, E.B., Aven, T., Why risk acceptance criteria need to be defined by the authorities and not the industry?	Abrahamsen, E.B., Aven, T.	2012	2011-11-10	I-R RAC, S-R RAC used in industry	Qualitative	Graphical	I-B RAC, S-R RAC	Other	Qualitative	Theoretical Foundations	Industry	Reliability Engineering and System Safety			Elsevier			139
79	Formal safety assessment: An updated review	Psaraftis, H.N.	2012	2012-04-09	C-B RAC, ENV RAC used in marine environment	Quantitative	Graphical, Theoretical	C-B RAC, ENV RAC	FSA	Qualitative	Theoretical Foundations	Industry (Maritime)	Journal of Marine Science and Technology (Japan)			Springer			140
80	A combined usage of stochastic and quantitative risk assessment methods in the worksites: Application on an electric power provider	Marhavilas, P.K., Koulouriotis, D.E.	2012	2011-09-24	I-B RAC, S-R RAC used in the electric-power industry	Qualitative, Quantitative	Graphical, Theoretical	I-B RAC, S-R RAC	Proportional quantitative risk-assessment technique (PRAT), The time-series stochastic process (TSP), Method of estimating the societal-risk (SRE) by F–N curves.	Qualitative, Quantitative	Case Study	Industry (Energy Production)	Reliability Engineering and System Safety			Elsevier			29
81	QRA Model-Based Risk Impact Analysis of Traffic Flow in Urban Road Tunnels	Meng, Q., Qu, X., Yong, K.T., Wong, Y.H.	2011	2011-05-05	S-R RAC used in road tunnels	Quantitative	Theoretical	S-R RAC	QRA	Quantitative	Theoretical foundations	Constructions	Risk Analysis			Wiley			141
82	The use of a basic safety investment model in a practical risk management context	Aven, T., Hiriart, Y.	2011	2011-07-21	S-R RAC used in a practical risk management context	Quantitative	Theoretical	S-R RAC	ALARP	Quantitative	Theoretical foundations	All fields	Reliability Engineering and System Safety			Elsevier			142
83	Life-safety risks and optimisation of protective measures against terrorist threats to infrastructure	Stewart, M.G.	2011	2011-01-01	C-B RAC, I-R RAC used in infrastructure	Quantitative	Theoretical	C-B RAC, I-R RAC	Other	Quantitative	Theoretical foundations	Constructions	Structure and Infrastructure Engineering			Taylor & Francis			143
84	Quantitative risk assessment on 2010 Expo hydrogen station	Aven, T.	2011	2010-12-14	I-B RAC, S-R RAC used in gaseous hydrogen refueling station	Quantitative	Theoretical	I-B RAC, S-R RAC	QRA	Quantitative	Theoretical foundations	Industry (Oil & Gas)	Reliability Engineering and System Safety			Elsevier			144
85	Risk acceptance criterion for tanker oil spill risk reduction measures	Psarros, G., Skjong, R., Vanem, E.	2011	2011-01-01	C-B RAC used in tanker oil-spill risk-reduction	Quantitative	Theoretical	C-B RAC	Other	Quantitative	Theoretical Foundations	Transportations	Marine Pollution Bulletin			Elsevier			145
86	Risk analysis and assessment methodologies in the work sites: On a review, classification and comparative study of the scientific literature of the period 2000-2010	Marhavilas, P.K., Koulouriotis, D., Gemeni, V.	2011	2011-03-08	I-B RAC, S-R RAC used in OHS	Qualitative, Quantitative	Theoretical	I-B RAC, S-R RAC	Other	Qualitative, Quantitative	Theoretical Foundations	All Fields	Journal of Loss Prevention in the Process Industries	Βάση για την Διπλωματική	HIGH	Elsevier			146
87	Quantitative risk assessment on a gaseous hydrogen refueling station in Shanghai	Zhiyong, L., Xiangmin, P., Jianxin, M.	2010	2010-04-03	I-B RAC, S-R RAC used in gaseous hydrogen refueling station	Quantitative	Theoretical	I-B RAC, S-R RAC	QRA	Quantitative	Theoretical foundations	Industry (Oil & Gas)	International Journal of Hydrogen Energy			Elsevier			147
88	Risk analysis and risk acceptance criteria in the planning processes of hazardous facilities - A case of an LNG plant in an urban area	Vinnem, J.E.	2010	2010-02-06	S-R RAC used in LNG plant	Qualitative, Quantitative	Theoretical	S-R RAC	Preliminary hazard analysis (PHA), Quantitative risk assessment (QRA)	Qualitative, Quantitative	Case Study	Industry (Oil & Gas)	Reliability Engineering and System Safety	εχει να κανει με τους κατ9ικους και όχι με τους εργαζομενους	LOW	Elsevier			148
89	Safety level of damaged RoPax ships: Risk modelling and cost-effectiveness analysis	Guarin, L., Konovessis, D., Vassalos, D.	2009	2009-06-16	C-B RAC, I-R RAC, S-R RAC used in ship-building indusrty	Quantitative	Theoretical	C-B RAC, I-R RAC, S-R RAC	Other	Quantitative	Theoretical Foundations	Industry (Ship Building)	Ocean Engineering			Elsevier			149
90	The risk management of third parties during construction in multifunctional Urban locations	Suddle, S.	2009	2009-06-11	I-R RAC, S-R RAC used in constructions	Quantitative	Theoretical	I-R RAC, S-R RAC	FMEA, QRA	Quantitative	Theoretical Foundations	Constructions	Risk Analysis			Wiley			150
91	Risk-informed process and tools for permitting hydrogen fueling stations	LaChance, J., Tchouvelev, A., Ohi, J.	2009	2009-01-15	I-B RAC, S-R RAC used in gaseous hydrogen refueling station	Qualitative	Theoretical	I-B RAC, S-R RAC	QRA	Qualitative	Theoretical Foundations	Industry (Oil & Gas)	International Journal of Hydrogen Energy			Elsevier			151
92	Legal framework considerations in the development of risk acceptance criteria	Hartford, D.N.D.	2009	2008-08-26	C-B RAC, ENV-RAC, I-R RAC, S-R RAC used in constructions	Qualitative	Theoretical	C-B RAC, ENV RAC, I-R RAC, S-R RAC	Other	Qualitative	Theoretical Foundations	Constructions	Structural Safety			Elsevier			152
93	Risk-based maintenance strategy and its applications in a petrochemical reforming reaction system	Hu, H., Cheng, G., Li, Y., Tang, Y.	2009	2009-02-03	C-B RAC used in petrochemical industry	Qualitative, Quantitative	Algorithm	C-B RAC	Risk-based maintenance (RBM)	Hybrid	Theoretical Foundations	Industry	Journal of Loss Prevention in the Process Industries		MEDIUM	Elsevier			153
94	On the consistency of risk acceptance criteria with normative theories for decision-making	Abrahamsen, E.B., Aven, T.	2008	2008-03-25	I-R RAC, S-R RAC used in OHS	Qualitative, Quantitative	Theoretical	I-R RAC, S-R RAC	ETA	Qualitative, Quantitative	Theoretical Foundations	All fields	Reliability Engineering and System Safety		LOW	Elsevier			154
95	Injuries in U.S. mining operations - A preliminary risk analysis	Komljenovic, D., Groves, W.A., Kecojevic, V.J.	2008	2007-01-16	S-R RAC used in OHS	Quantitative	Theoretical	S-R RAC	Holistic risk-management process	Quantitative	Accident Data	Engineering	Safety Science		MEDIUM	Elsevier			155
96	Risk informed decision-making and its ethical basis	Ersdal, G., Aven, T.	2008	2006-12-29	C-B RAC, S-R RAC used in OHS	Qualitative, Quantitative	Theoretical	C-B RAC, S-R RAC	ALARP	Qualitative, Quantitative	Theoretical Foundations	All fields	Reliability Engineering and System Safety			Elsevier			156
97	Cost-effectiveness criteria for marine oil spill preventive measures	Vanem, E., Endresen, O., Skjong, R.	2008	2007-07-30	C-B RAC, ENV-RAC used in marine oil spill	Qualitative	Theoretical	C-B RAC, ENV RAC	CBA	Qualitative	Theoretical Foundations	Industry (Oil & Gas)	Reliability Engineering and System Safety	Enviromental Damages…	LOW	Elsevier			157
98	What risk should public accept from chemical process facilities?	Meyer, E., Andreassen, G., Wei, C., Shaw, S.	2007	2007-01-30	I-B RAC, S-R RAC used in chemical process facilities	Qualitative, Quantitative	Theoretical	I-R RAC, S-R RAC	Other	Qualitative, Quantitative	Theoretical Foundations	Industry (Chemical Process)	Process Safety Progress			American Institute of Chemical Engineers (AIChE)			158
99	On the ethical justification for the use of risk acceptance criteria	Aven, T.	2007	2007-05-15	I-R RAC, S-R RAC used in OHS	Qualitative	Theoretical	I-R RAC, S-R RAC	Bayesian Networks	Qualitative	Theoretical Foundations	All fields	Risk Analysis			Wiley			159
100	Risk criteria for the shipping industry	Trbojevic, V.M.	2006	2006-04-15	I-R RAC, S-R RAC used in shiping industry	Quantitative	Theoretical	I-R RAC, S-R RAC	FSA	Quantitative	Theoretical Foundations	Industry (Ship Building)	Quality and Reliability Engineering International			Wiley			160
101	Pipeline risk assessment and risk acceptance criteria in the State of São Paulo, Brazil	Kirchhoff, D., Doberstein, B.	2006	2006-09-01	I-R RAC, S-R RAC used in pipelines	Qualitative	Theoretical	I-R RAC, S-R RAC	Other	Qualitative	Theoretical Foundations	Industry	Impact Assessment and Project Appraisal			Taylor & Francis			50
102	The third spatial dimension risk approach for individual risk and group risk in multiple use of space	Suddle, S., Ale, B.	2005	2005-04-10	I-R RAC, S-R RAC used in constructions	Qualitative, Quantitative	Theoretical	I-R RAC, S-R RAC	Other	Qualitative, Quantitative	Theoretical Foundations	Constructions	Journal of Hazardous Materials			Elsevier			161
103	On the use of risk acceptance criteria in the offshore oil and gas industry	Aven, T., Vinnem, J.E.	2005	2004-10-25	I-R RAC, S-R RAC used in gas industry	Qualitative, Quantitative	Graphical	I-R RAC, S-R RAC	QRA	Qualitative, Quantitative	Empirical Data	Industry (Oil & Gas)	Reliability Engineering and System Safety	No use of RAC	MEDIUM	Elsevier			162
104	Social risk assessment of large technical systems	Pasman, H.J., Vrijling, J.K.	2003	2003-09-04	I-R RAC, S-R RAC used in technical systems	Quantitative	Theoretical	I-R RAC, S-R RAC	Other	Quantitative	Theoretical Foundations	Engineering	Human Factors & Ergonomics In Manufacturing			Wiley			163
105	Risk assessment for civil engineering facilities: Critical overview and discussion	Faber, M.H., Stewart, M.G.	2003	2003-01-03	I-R RAC, S-R RAC used in civil engineering facilities	Quantitative	Theoretical	I-R RAC, S-R RAC	Other	Quantitative	Theoretical Foundations	Engineering	Reliability Engineering and System Safety			Elsevier			164
106	An overview of quantitative risk measures for loss of life and economic damage	Jonkman, S.N., Van Gelder, P.H.A.J.M., Vrijling, J.K.	2003	2002-09-03	C-B RAC, ENV-RAC, I-R RAC, S-R RAC used in OHS	Qualitative, Quantitative	Theoretical	C-B RAC, ENV RAC, I-R RAC, S-R RAC	QRA	Qualitative, Quantitative	Theoretical Foundations	All fields	Journal of Hazardous Materials			Elsevier			165
107	On the ALARP approach to risk management	Melchers, R.E.	2001	2000-09-08	S-R RAC used in risk management	Quantitative	Theoretical	S-R RAC	Other	Quantitative	Theoretical Foundations	Engineering	Reliability Engineering and System Safety			Elsevier			166
108	Risk assessment in maritime transportation	Soares, C.G., Teixeira, A.P.	2001	2001-08-16	C-B RAC, S-R RAC used in maritime transportation	Qualitative, Quantitative	Theoretical	C-B RAC, S-R RAC	Other	Qualitative, Quantitative	Theoretical Foundations	Transportations	Reliability Engineering and System Safety			Elsevier			167
109	Use of risk assessment in the nuclear industry with specific reference to the Australian situation	Cameron, R.F., Willers, A.	2001	2001-10-13	I-R RAC, S-R RAC used in nuclear industry	Quantitative	Theoretical	I-R RAC, S-R RAC	HIFAR PSA (Probabilistic Safety Assessment)	Quantitative	Theoretical Foundations	Industry (Nuclear)	Reliability Engineering and System Safety		MEDIUM	Elsevier			168
110	Risk informed resource allocation policy: Safety can save costs	Pasman, H.J.	2000	2000-01-02	C-B RAC used in process industry	Qualitative, Quantitative	Theoretical	C-B RAC	QRA	Qualitative, Quantitative	Theoretical Foundations	Industry (Chemical Process)	Journal of Hazardous Materials			Elsevier			169
